# Supplementary material for: Geographical accessibility to the supply of antiophidic sera in Brazil: Timely access possibilities
Source: PubMed Central journal article supplement (PMC8757981; doi:10.1371/journal.pone.0260326), 2022-01-13
Supplement: pone.0260326.s003.pdf [file pone.0260326.s003.pdf]

## Abstract

- Methods must describe: the type of study design.

## Methods

- Data analysis: it is necessary to describe, as well as the association measures which were used, the statistical tests and the level of significance considered.
